# Supplementary material for: Thermal and Physico-Mechanical Characterizations of Thromboresistant Polyurethane Films
Source: MDPI journal article supplement (doi:10.3390/bioengineering6030069), 2019-08-14
Supplement: s1 [file s1]

# Thermal and Physico-Mechanical Characterizations of Thromboresistant Polyurethane Films

Aaron C. Wilson, Shih-Feng Chou, Roberto Lozano, Jonathan Y. Chen, and Pierre F. Neuenschwander

<sup>1</sup> Department of Mechanical Engineering, College of Engineering, The University of Texas at Tyler, 3900 University Blvd, Tyler, TX 75799, USA

<sup>2</sup> School of Human Ecology, College of Natural Sciences, The University of Texas at Austin, Austin, TX 78712, USA

<sup>3</sup> Department of Cellular and Molecular Biology, The University of Texas Health Science Center at Tyler, Tyler, TX 75708, USA

\* Correspondence: schou@uttyler.edu; Tel: 1-(903)-566-6209

Received: 25 June 2019; Accepted: 7 August 2019; Published: date

## Supplementary Materials

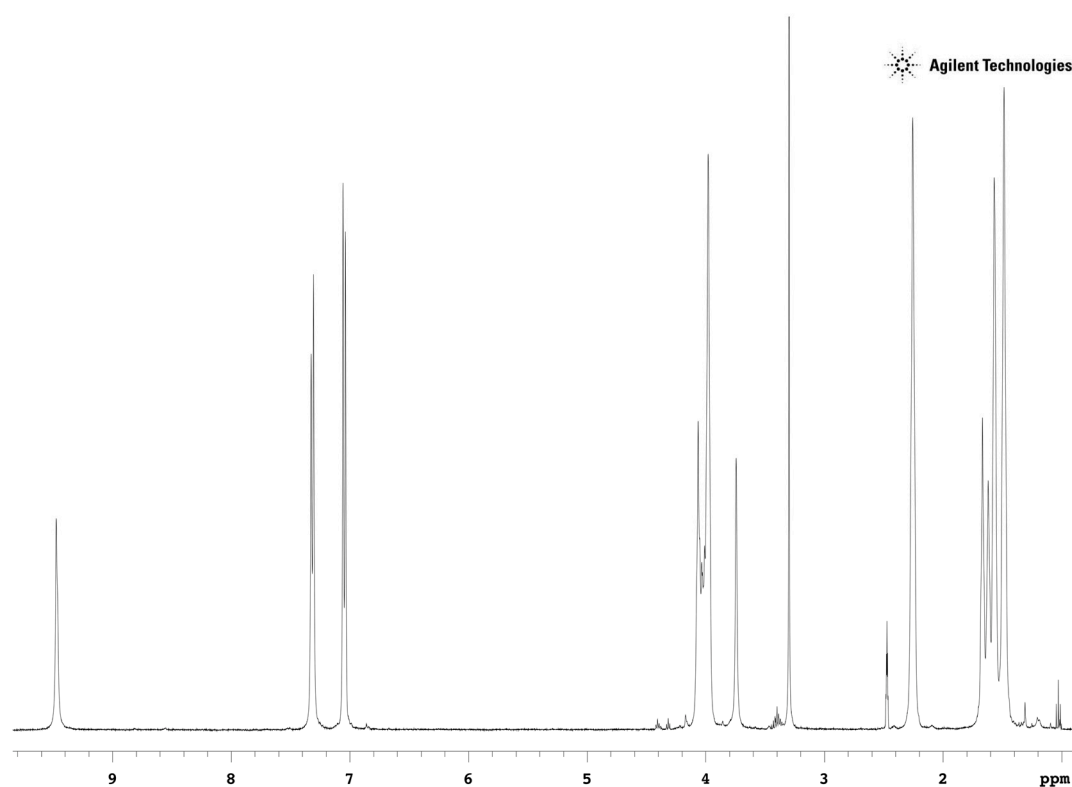

**Figure S1.**  $^1\text{H}$  NMR spectrum of 60ES sample.

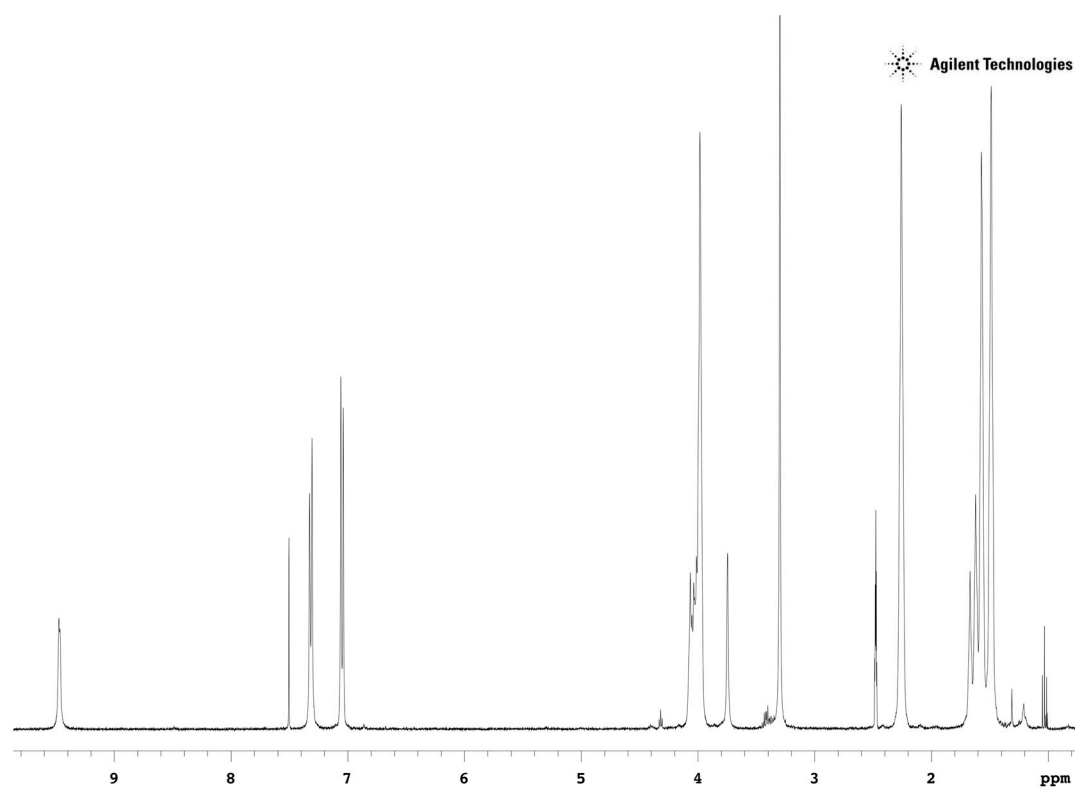

Figure S2.  $^1\text{H}$  NMR spectrum of 100ES sample.

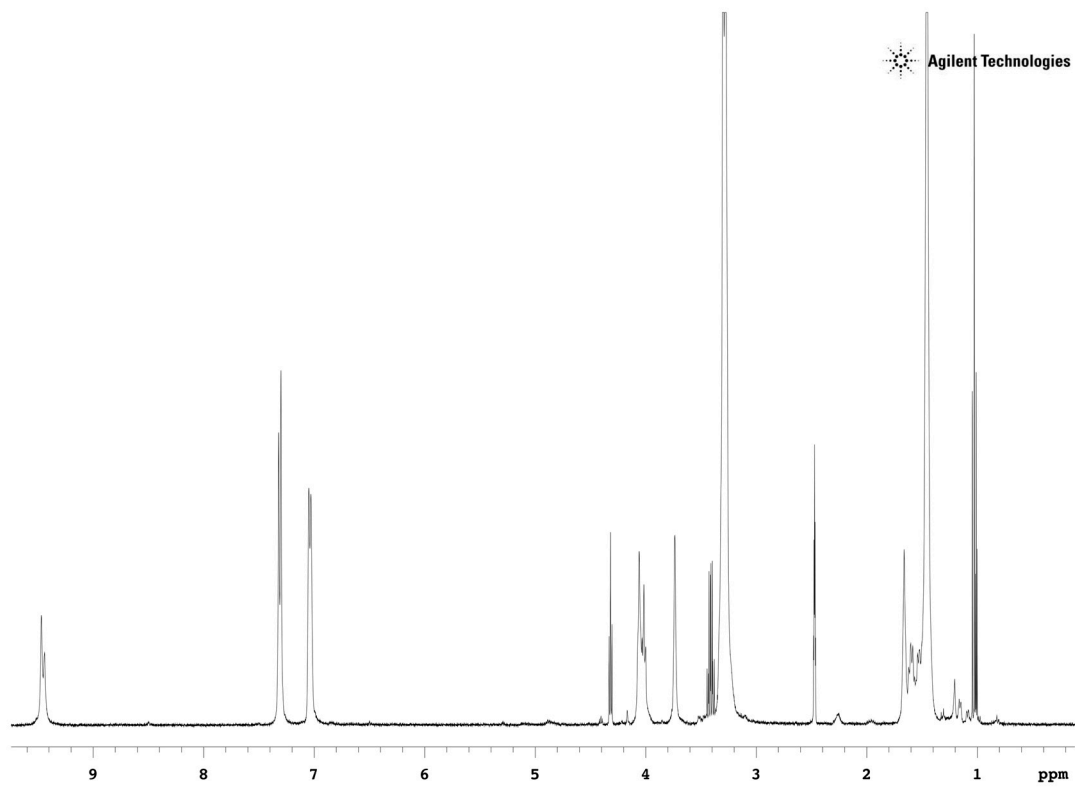

Figure S3.  $^1\text{H}$  NMR spectrum of 60ET sample.

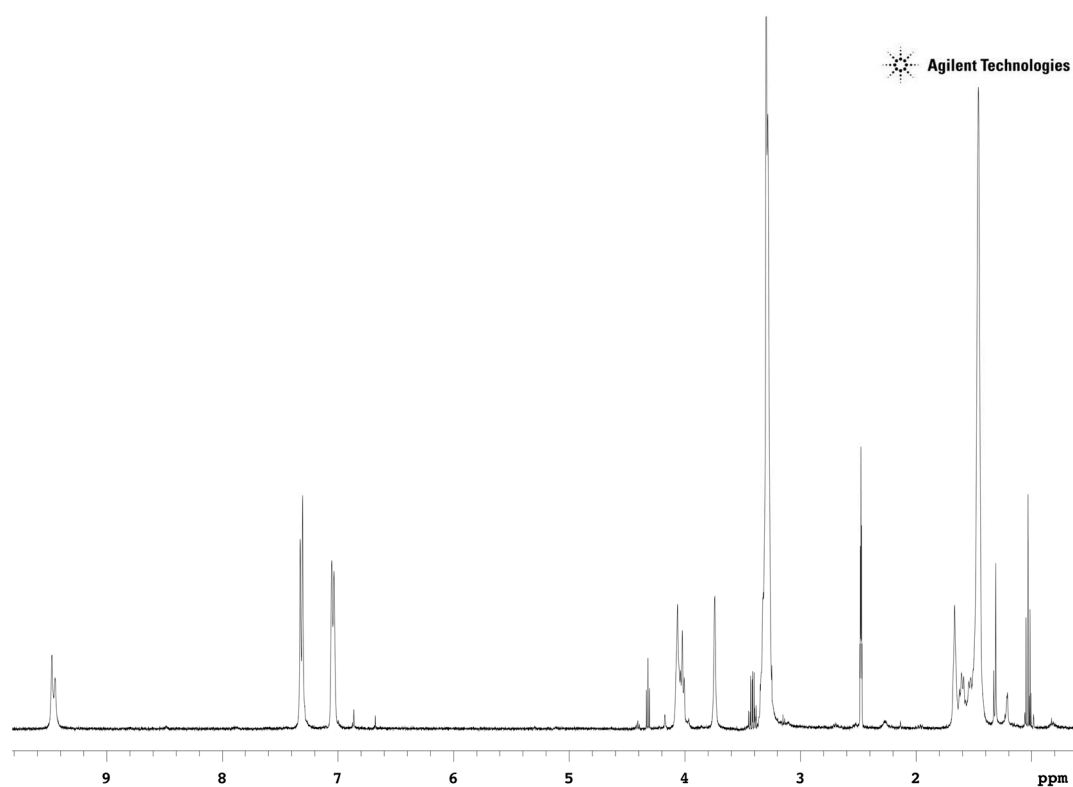

**Figure S4.**  $^1\text{H}$  NMR spectrum of 200ET sample.
